# Supplementary material for: A 3-dimensional spiro-functionalized platinum(ii) complex to suppress intermolecular π–π and Pt⋯Pt supramolecular interactions for a high-performance electrophosphorescent device
Source: Royal Society of Chemistry journal article supplement (doi:10.1039/c2cc30595j), 2012-01-01
Supplement: c2cc30595j.pdf [file c2cc30595j.pdf]

## Supporting Information

for

### A 3-Dimensional Spiro-functionalized Platinum(II) Complex to Suppress Intermolecular $\pi$ - $\pi$ or Pt $\cdots$ Pt Supramolecular Interactions for High-performance Electrophosphorescent Device

Xiang-Hua Zhao<sup>a</sup>, Guo-Hua Xie<sup>b</sup>, Zheng-Dong Liu<sup>a</sup>, Wei-Jie Li<sup>a</sup>, Ming-dong Yi<sup>a</sup>,  
Ling-Hai Xie<sup>\*a</sup>, Chao-Peng Hu<sup>a</sup>, Rui Zhu<sup>a</sup>, Qiang Zhao<sup>a</sup>, Yi Zhao<sup>b</sup>, Jian-Feng Zhao<sup>a</sup>,  
Yan Qian<sup>a</sup> and Wei Huang<sup>\*a</sup>.

Key Laboratory for Organic Electronics & Information Displays (KLOEID), Institute of Advanced Materials (IAM), Nanjing University of Posts & Telecommunications, Nanjing 210046, China.

State Key Laboratory on Integrated Optoelectronics, College of Electronics Science and Engineering, Jilin University, 2699 Qianjin Street, Changchun 130012, China.

## Table of Contents

**Materials and Methods**

**Computational Details**

**Device Fabrication**

**Experimental Section**

**<sup>1</sup>H NMR and <sup>13</sup>C NMR Spectra**

**Absorption, Normalized EL and Photoluminescence Spectra**

**TG and DSC Spectra**

**Computational Spectra**

**Cyclic Voltammograms of the Complex**

**Device Structure and Performance**

**Materials and Methods:** All the solvents and chemicals were obtained from Nanjing Fountain Global Displays. Fluorenone, 2-bromopyridine, and phenol,

methanesulfonic acid, *n*-butyl-lithium tetrakis(triphenylphosphine) palladium(0), tetrabutyl ammonium bromide, tributyl borate, were used without further purification. 2-Bromospiro[fluorene-9,9'-xanthene] and 2-(spiro[fluorene-9,9'-xanthene]-2-yl)-1,3,2-dioxaborinane were synthesized according to the literature reports.<sup>1</sup> Ligand 9-(pyridin-2-yl)fluoren-9-ol was prepared according to the already published procedures.<sup>2</sup> All reactions involving organometallic reagents were carried out under nitrogen. <sup>1</sup>H (400 MHz) and <sup>13</sup>C NMR (100 MHz) spectra measurements were recorded on a Bruker 400 MHz spectrometer in CDCl<sub>3</sub>. Mass spectra were carried out on a Shimadzu GCMS 2010 PLUS. Absorption and emission spectra were performed on a Shimadzu UV-3600 and Shimadzu RF-5301(PC)S luminescence spectrometer at 25 °C, respectively. Cyclic voltammetric (CV) was conducted on a CHI660C Electrochemical Workstation in a typical three-electrode cell with a platinum sheet working electrode, a reference electrode (Ag/Ag<sup>+</sup>, referenced against ferrocene/ferrocenium (FOC)), and a platinum wire counter electrode. CV measurements were performed by coating film under nitrogen atmosphere in a solution of tetrabutylammonium hexafluorophosphate (*n*-Bu<sub>4</sub>NPF<sub>6</sub>) in acetonitrile at room temperature at a sweeping rate of 100 mV/s. The HOMO/LUMO energy levels of the complex are estimated according to the empirical formula HOMO/LUMO =  $-[E_{onset} - E_{(Fc/Fc^+) + 4.8}]$  eV, where  $E_{(Fc/Fc^+)}$  is about 0.0095 V. Differential scanning calorimeter measurement (DSC) was researched by a Shimadzu DSC-60A from 25 °C to 180 °C at a scan rate of 10 °C/min under N<sub>2</sub> atmosphere. The thermogravimetric analysis (TGA) was performed on a Shimadzu DTG-60 from 25 °C to 750 °C at a heating rate of 10 °C/min under N<sub>2</sub> atmosphere.

**Computational Details:** Calculations of the compounds were performed on the electronic ground state by Becke's three-parameter density functional in combination with LeeYang Parr's correlation functional (B3LYP) employed 6-31G(d) basis sets.<sup>3</sup> The ground-state geometries were fully optimized at the B3LYP level. All computations were performed on the Gaussian 03 package.

**Device Fabrication:** The pre-patterned indium tin oxide (ITO)-coated glass with a sheet resistance of 10  $\Omega$ /square was used as the starting substrate. Before device fabrication, the substrates were cleaned by ultrasonic sequentially with detergent, acetone, ethanol, and deionized water. After this, all of them were dried in an oven and treated in an ultraviolet-ozone chamber. Then, 100-nm-thick Al serving as cathode was directly on the organic layers after the organic compounds were deposited on the ITO substrate. The active device area was 2 x 2 mm<sup>2</sup> defined through a shadow mask. The external quantum efficiency was evaluated by the method mentioned in the literature.<sup>4</sup> Current-voltage-luminance (J-V-L) characteristics were recorded simultaneously by a PR650 spectrascan spectrometer and a Keithley 2400 programmable voltage-current source. All the measurements were carried out in the ambient environment without encapsulation.

## Experimental Section

### (1a) Synthesis of 2-(spiro [fluorene-9, 9'-xanthene]-2-yl)pyridine (SFXPy)

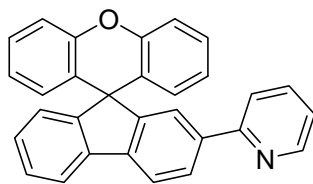

To a three-neck flask was added compounds 2-bromospiro[fluorene-9,9'-xanthene] (1.25 g, 3.0 mmol), 2-bromopyridine (0.29 mL, 3.0 mmol), Pd(PPh<sub>3</sub>)<sub>4</sub> (0.02 g, 0.02 mmol), degassed toluene and THF (1:1, 60 mL) and K<sub>2</sub>CO<sub>3</sub> (2M, 10 mL) was added. The mixture was heated to reflux and avoided light exposure under N<sub>2</sub> atmosphere for 48 h. The product was extracted with dichloromethane and dried over anhydrous Na<sub>2</sub>SO<sub>4</sub>. The organic solvent was removed by rotary evaporation under vacuum, and the crude product was purified by column chromatography using on silica gel with ethyl acetate/petroleum ether (8:1) as eluent to afford white solid; yield: 78%. <sup>1</sup>H NMR (400 MHz, CDCl<sub>3</sub>, ppm):  $\delta$  8.61 (d,  $J$  = 4.19 Hz, 1H), 8.11(dd, 1H), 7.91 (d,  $J$  = 7.99 Hz, 1H), 7.83 (d,  $J$  = 7.61 Hz, 1H), 7.77(s, 1H), 7.64 (m, 2H), 7.38 (t,  $J$  = 6.33 Hz, 1H), 7.22 (t,  $J$  = 6.87 Hz, 4H), 7.12 (m, 3H), 6.77 (t,  $J$  = 7.41 Hz, 2H), 6.46(d,  $J$  = 7.83 Hz, 2H).

### (1b) Synthesis of [Pt(SFXPy)( $\mu$ -Cl)]<sub>2</sub>

The chloride bridged platinum complex [Pt(SFXPy)( $\mu$ -Cl)]<sub>2</sub> was prepared by heating 2-2.5 equiv of cyclometalating ligand with 1 equiv K<sub>2</sub>PtCl<sub>4</sub> salt in a mixture of 2-ethoxyethanol (Aldrich)/water (3:1) at 80 °C for 16 h.<sup>4</sup> The dimer was isolated by filtration under vacuum and prepared for next reaction without purification.

### (1c) Pt(SFXPy)(PyFO)

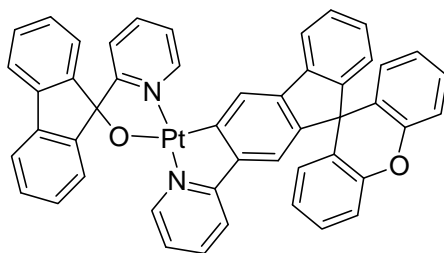

A mixture of [Pt(SFXPy)( $\mu$ -Cl)]<sub>2</sub> (0.26 g, 0.20 mmol), PyFOH (0.08 g, 0.30 mmol) and Na<sub>2</sub>CO<sub>3</sub> (0.21 g, 2.0 mmol) in 10 mL of 2-methoxyethanol was heated at 100 °C for 16 h. After cooling to room temperature, 20 mL of water was added into the reaction mixture to induce precipitation. The precipitate was collected by filtration. The yellowish green [Pt(SFXPy)(PyFO)] (0.11 g, 0.13 mmol) was recrystallized from a mixture of CH<sub>2</sub>Cl<sub>2</sub> and hexane at room temperature; yield: 33%. <sup>1</sup>H NMR (400 MHz, CDCl<sub>3</sub>, ppm):  $\delta$  9.47 (d,  $J$  = 5.65 Hz, 1H), 9.08 (d,  $J$  = 4.78 Hz, 1H), 8.12 (t,  $J$  = 8.09 Hz 3H), 7.88 (d,  $J$  = 7.58 Hz, 1H), 7.71 (d,  $J$  = 7.47 Hz, 2H), 7.63 (m, 2H), 7.47 (d,  $J$  = 8.31 Hz, 1H), 7.37 (m, 5H), 7.27 (s, 1H), 7.25 (m, 4H), 7.20 (m, 3H), 6.87 (t,  $J$  = 6.02 Hz, 1H), 6.82 (t,  $J$  = 6.58 Hz, 2H), 6.60 (m, 3H). <sup>13</sup>C NMR (100 MHz, CDCl<sub>3</sub>, ppm):  $\delta$  177.78, 166.90, 156.32, 153.13, 151.42, 150.11, 149.75, 146.44, 145.09, 141.37, 139.93, 139.54, 138.16, 137.00, 128.55, 128.47, 128.33, 128.03, 127.65, 125.73, 125.23, 125.12, 123.35, 122.98, 122.76, 121.25, 121.00, 120.77, 119.97, 118.25, 116.69, 94.02, 54.01.

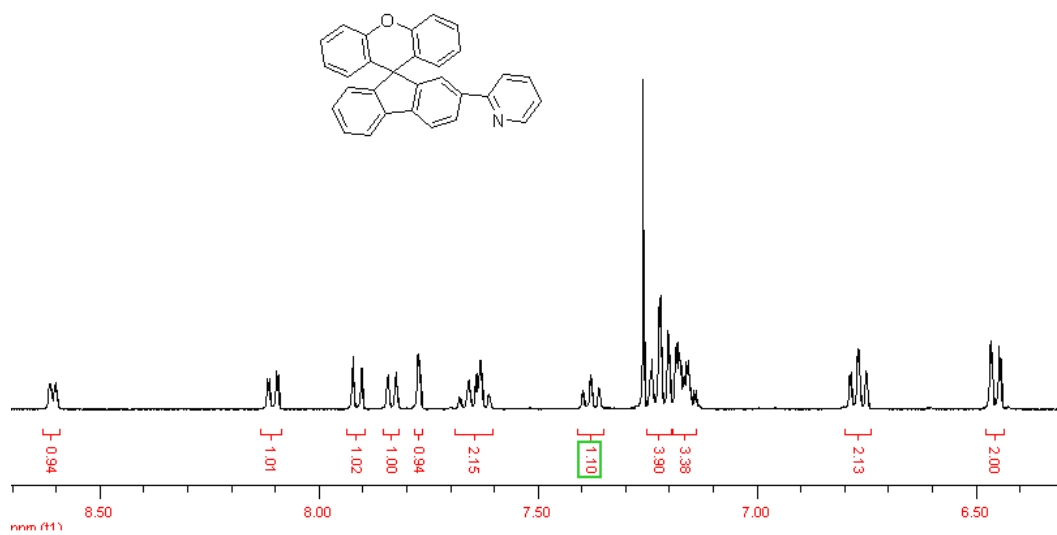

Fig. S1a  $^1\text{H}$  NMR of PySFX in  $\text{CDCl}_3$ .

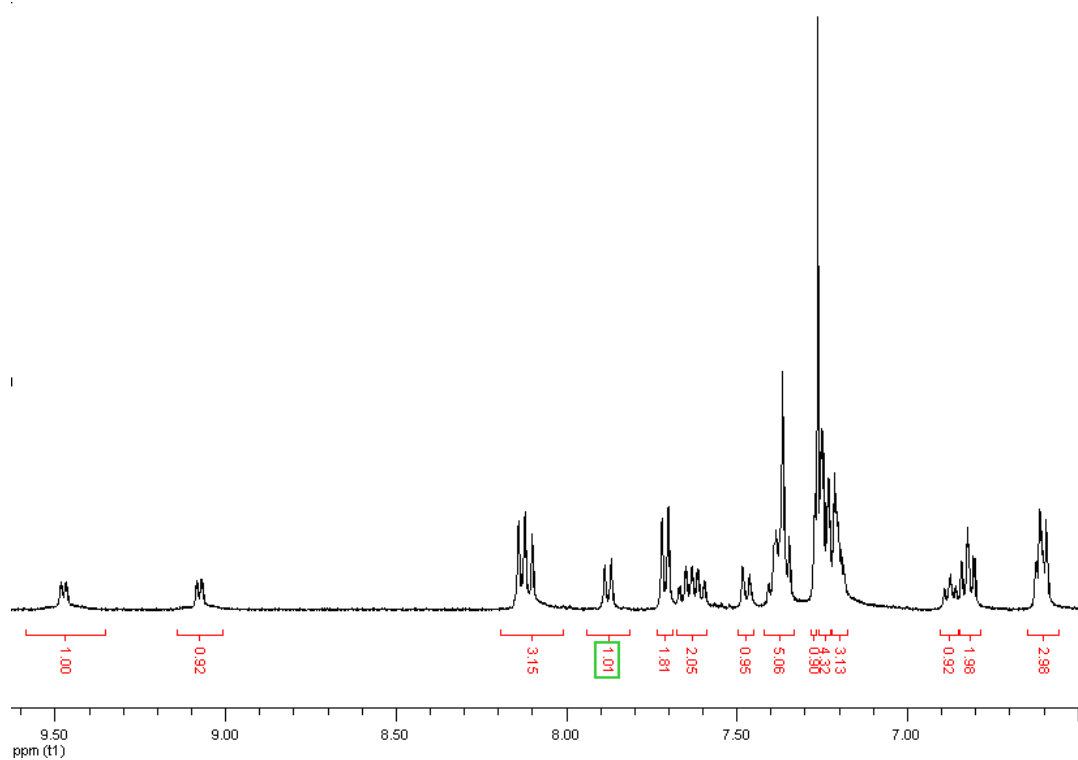

Fig. S2a  $^1\text{H}$  NMR of  $\text{Pt}(\text{PySFX})(\text{PyFO})$  in  $\text{CDCl}_3$ .

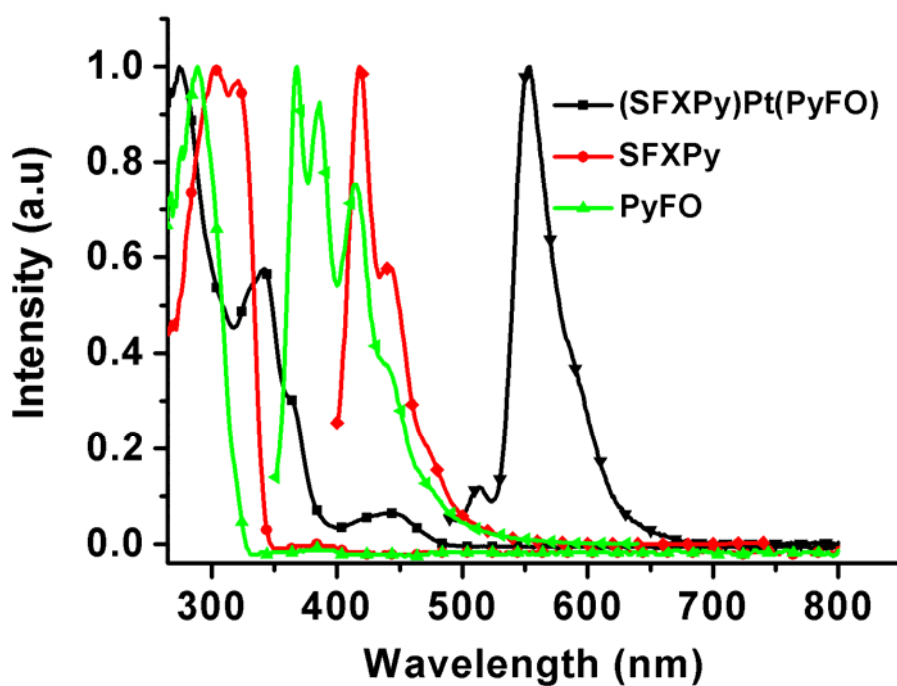

**Fig. S3** The normalized absorption and photoluminescence spectra of Pt(SFXPy)-(PyFO), SFXPy and PyFO in  $\text{CH}_2\text{Cl}_2$ .

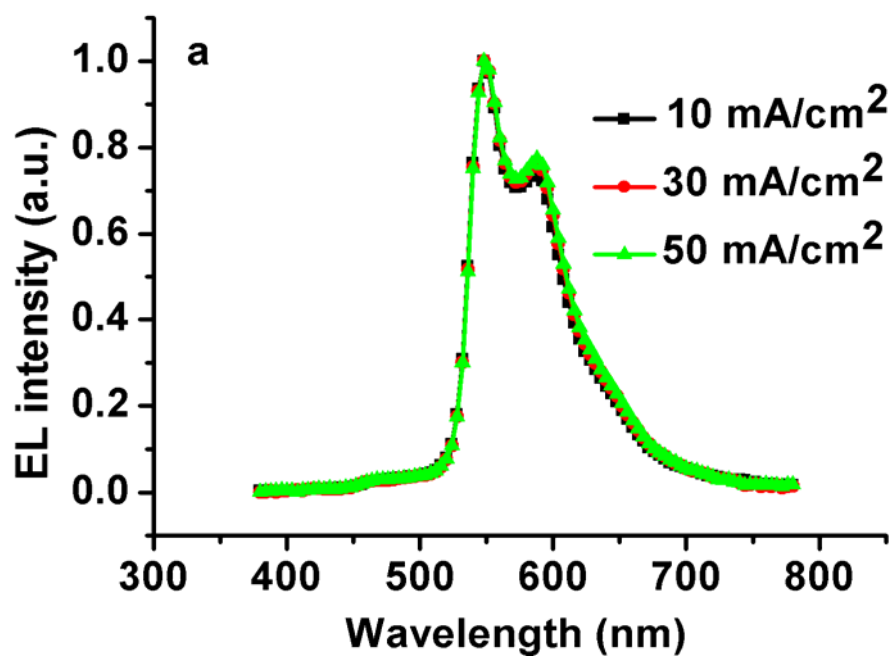

**Fig. S4** Normalized EL spectra of Devices A at different current density

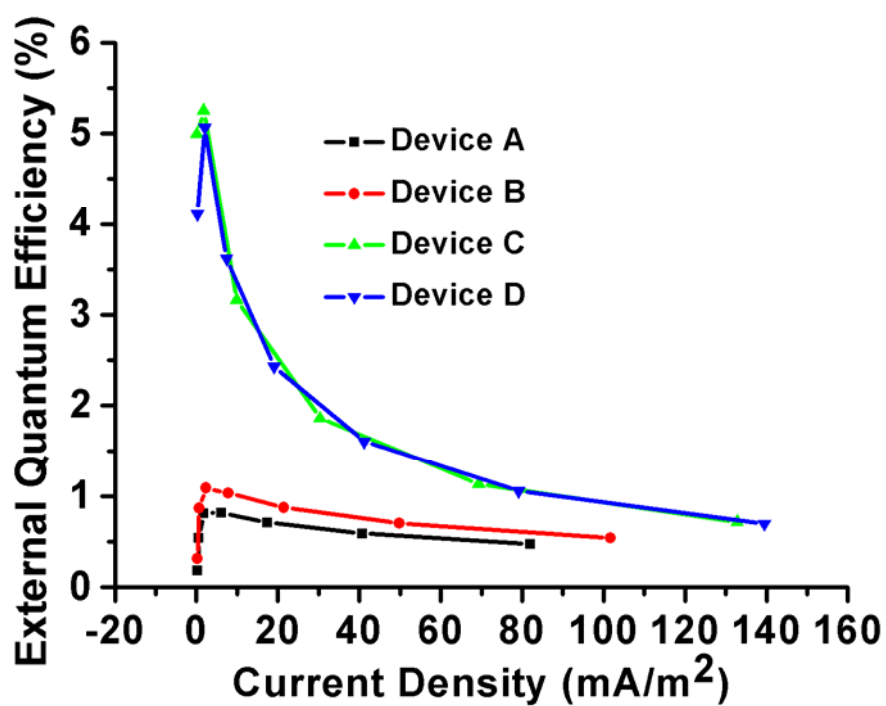

Fig. S5 Current density-external quantum efficiency characteristics of Devices A-D

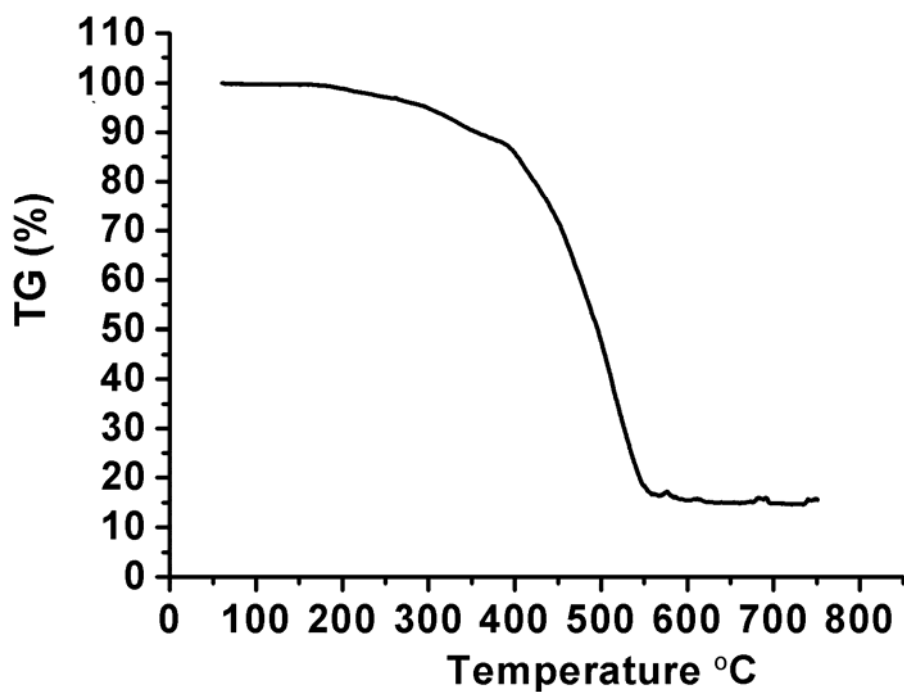

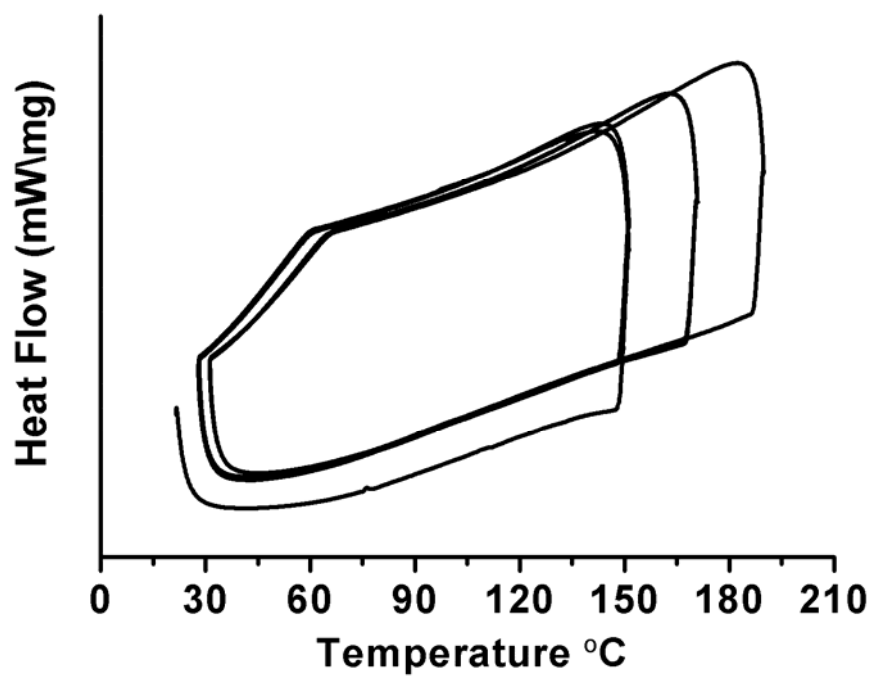

**Fig. S6** The TGA and DSC curve of the complex.



| Molecule        | HOMO                                                                                         | LUMO                                                                                           |
|-----------------|----------------------------------------------------------------------------------------------|------------------------------------------------------------------------------------------------|
| PyFOH           | 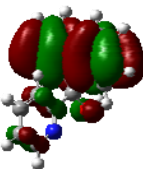<br>-5.89eV | <br>-0.99eV |
| SFXPy           | <br>-5.59eV | <br>-1.36eV |
| (SFXPy)Pt(PyFO) | <br>-4.92eV | <br>-1.71eV |

**Fig. S7** Molecular orbital diagram for the LUMO/HOMO and their energy levels of Pt(II) complex and its ligands.

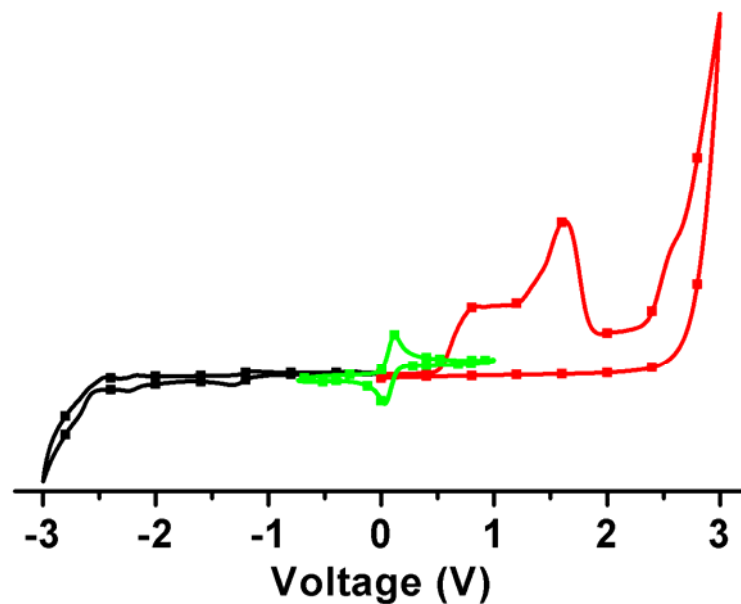

**Fig. S8** Cyclic voltammogram of the four complexes and ferrocene measured with a scan rate of  $100 \text{ mV s}^{-1}$  in acetonitrile solution.

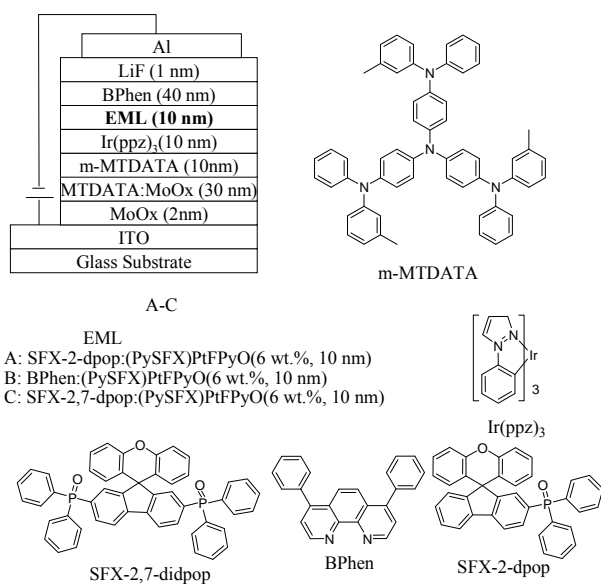

**Fig. S9** The structure for OLEDs and the molecular structures of the used compounds used in these devices. Bphen: 4, 7-Diphenyl-1, 10-diazaphenanthrene ; SFX-2-dop: 2-phenylphosphoryl-spiro[fluorine-9, 9'-xanthene]; SFX-2, 7-diddop: 2, 7-bis(diphenylphosphoryl)spiro[fluorine-9, 9'-xanthene]; m-MTDATA: 4, 4', 4''-Tris(N-3-methylphenyl-N-phenylamino) triphenylamine; ITO: indium tin oxide.

**Table S1.** The comparison of EL performance of the devices

| Device | $L/V^a$<br>( $\text{cd m}^{-2}/\text{V}$ ) | $\eta_{\text{ext,max}} [\%]^b$ | $\eta^c$<br>$\text{cd A}^{-1}$ | $\eta^d$<br>$\text{lm W}^{-1}$ | $\lambda_{\text{max}}/\text{nm}$ (CIE) <sup>e</sup> |
|--------|--------------------------------------------|--------------------------------|--------------------------------|--------------------------------|-----------------------------------------------------|
| A      | 2439/8.0                                   | 0.8                            | 2.6 (5.7)                      | 1.8 (1.9)                      | 547 (0.47, 0.51)                                    |
| B      | 3005/8.0                                   | 1.1                            | 3.4 (2.3)                      | 2.4 (2.3)                      | 547 (0.48, 0.52)                                    |
| C      | 3325/6.0                                   | 5.2                            | 16.0 (1.6)                     | 16.8 (1.1)                     | 550 (0.45, 0.50)                                    |
| D      | 3244/6.0                                   | 5.1                            | 15.5 (1.9)                     | 16.2 (1.5)                     | 550 (0.46, 0.50)                                    |

<sup>a</sup>Luminance/Voltage, and <sup>b</sup>maximum external quantum efficiency, <sup>c</sup>current efficiency (CE) and <sup>d</sup>power efficiency (PE) (The current densities ( $\text{mA}/\text{cm}^2$ ) of the measured CE and PE are shown in brackets). <sup>e</sup>CIE chromaticity coordinates.

## References

1. (a) L. H. Xie, F. Liu, C. Tang, X. Y. Hou, Y. R. Hua, Q. L. Fan and W. Huang, *Organic Letters.*, 2006, **8**, 2787-2790; (b) J. F. Gu, G. H. Xie, L. Zhang, S. F. Chen, Z. Q. Lin, Z. S. Zhang, J. F. Zhao, L. H. Xie, C. Tang and Y. Zhao, *The Journal of Physical Chemistry Letters.*, 2010, **1**, 2849-2853.
2. A. Soldatenkov, N. Kolyadina, L. Kuleshova and V. Khrustalev, *Chemistry of Heterocyclic Compounds.*, 1996, **32**, 817-821.
3. (a) A. D. Becke, *The Journal of Chemical Physics*, 1993, **98**, 5648; (b) C. Lee, W. Yang and R. G. Parr, *Physical Review B.*, 1988, **37**, 785.
4. R. Meerheim, R. Nitsche and K. Leo, *Applied physics letters.*, 2008, **93**, 043310.
